1 **Effect of the Healing Fit program on sleep quality, stress, and concentration: a**  
2 **randomized controlled study**

3

4 Wonjong Kim<sup>1\*</sup>, Iklyul Bae<sup>2</sup>, Kiyong Kim<sup>3</sup>, Wonheo Ju<sup>4</sup>

5 <sup>1</sup> Department of Nursing, Eulji University, Uijeongbu-si, Gyeonggi-do, Republic of Korea

6 <sup>2</sup> Stress Solution Co., Ltd., Jung-gu, Daejeon, Republic of Korea

7 <sup>3</sup> Department of Nursing, Gimcheon University, Gimcheon-si, Gyeongsangbuk-do, Republic of Korea

8 <sup>4</sup> Mobifren Corp., Gumi-si, Gyeongbuk-do, Republic of Korea

9

10 **\*Corresponding author:**

11 Wonjong Kim

12 Email: [wjtkfkd77@naver.com](mailto:wjtkfkd77@naver.com)

## 13 ABSTRACT

14 This study examined the usefulness for improving sleep quality of the Healing Fit program, which  
15 provides micro-electrical stimulation of the brain (transcranial electrical stimulation) and music therapy,  
16 in healthy adults who experienced sleep deprivation. A randomized controlled pretest–posttest design  
17 was used to evaluate effects on sleep quality, stress, and concentration. The study began after approval  
18 from the Institutional Review Board of Eulji University before conducting the study (EU22-90). Healing  
19 Fit was applied to the experimental group (n = 25) at a volume of 50 dB (about the level of normal  
20 conversation) for 30 min. Transcranial electrical stimulation intensity was set individually from 1 to 10 to  
21 the extent that the participant had no pain. Afterwards, interventions corresponding to learning, healing,  
22 and sleep music within Healing Fit were applied three times a day (30 min per session) for 14 days while  
23 participants continued their normal daily routines. The 25 control participants rested without any  
24 treatment for 30 min. Subjective/objective sleep quality, subjective/objective stress, concentration, and  
25 general characteristics were measured on day 1 of the experiment in both groups. Objective/subjective  
26 sleep quality was measured on day 7 and objective/subjective sleep quality, objective/subjective stress,  
27 and concentration were measured on day 14. The total sleep time, waking time after sleep onset, sleep  
28 efficiency, deep sleep, and subjective sleep quality were significantly better in the experimental group  
29 than in the control group. Objective and subjective stress decreased significantly in the experimental  
30 group compared to the control group, but there were no significant differences in autonomic nervous  
31 system activity. However, sympathetic and parasympathetic nervous system activity was balanced  
32 when Healing Fit was applied. There were no significant differences in concentration between groups;  
33 however, concentration tended to increase over time in the experimental group.

34

35 **Clinical Trial Registration:** Clinical Research Information Service (<https://cris.nih.go.kr/>;  
36 KCT0009045).

37

## 38 INTRODUCTION

39 According to statistics from the Organisation for Economic Co-operation and Development (OECD), the  
40 average sleep time of South Koreans is 7 h 41 min, which is 41 min less than the average across the  
41 OECD countries. According to the Health Insurance Review & Assessment Service, the number of  
42 patients with insomnia in South Korea increased by 35% from 2012 to 2016. Despite increasing interest  
43 in the effect of sleep on quality of life and health among South Koreans, there are no systematic  
44 definitions and approaches to this matter [1].

45 Sleep accounts for one-third of the life cycle and is essential for maintaining homeostasis.  
46 Sleep affects hormone secretion, metabolic activity, the immune system, and quality of life [2,3].  
47 Adequate sleep is essential for physical recovery and maintaining normal body functions, and positively  
48 affects psychological stability by relieving stress and tension. During sleep, the brain processes  
49 information, which can enhance memory, learning ability, and cognitive functioning [4]. Conversely,  
50 insufficient sleep causes fatigue, impairs concentration, and negatively impacts academic performance  
51 [5]. Reduced sleep leads to an increase in the prevalence of diseases such as insomnia, and a rise in  
52 social costs, such as those caused by drowsiness-induced traffic accidents, the worsening of chronic  
53 conditions, and depression diagnosis and treatment [1]. Furthermore, sleep is related to interactions  
54 within the autonomic nervous system (ANS), with proper sleep increasing the activity of the  
55 parasympathetic nervous system (PNS), lowering body temperature, stabilizing the heart rate and  
56 breathing, and accelerating recovery. However, if sympathetic nervous system (SNS) activity increases,  
57 metabolism becomes more active and affects the heart rate, blood pressure, and respiration, making it  
58 difficult to fall asleep or enter deep sleep with resultant poor sleep quality and daily stress [6,7].

59 Stress refers to the tension felt in a situation where adaptation to the environment does not  
60 function well. When exposed to stress, the SNS is activated, speeding up the body's metabolism. Once  
61 the SNS is activated, blood pressure and heart rate increase, and the hypothalamic–pituitary–adrenal  
62 axis is activated, increasing the secretion of cortisol, a representative stress hormone [8]. Such  
63 metabolic acceleration disrupts the balance of the ANS, making it difficult to fall asleep and enter deep  
64 sleep. If this situation persists, proper physical and psychological recovery is not achieved, resulting in  
65 fatigue and impaired concentration [4].

66 Concentration is the ability to focus effort and attention on a specific task. Self-control is

67 essential to maintain concentration, and a lack of self-control can make it impossible to sustain that  
68 focus. By maintaining a high level of concentration, individuals can not only increase the efficiency of  
69 their learning but also achieve their goals more easily across various activities [9].

70           Healing Fit is a device that applies transcranial electrical stimulation (tES) and sound therapy.  
71 tES is a non-invasive and painless procedure that stimulates targeted cortical areas by applying a micro-  
72 electric current to two electrodes placed on the skull [10,11]. The microcurrent flowing between the two  
73 electrodes induces changes in neural excitability and activity through specific molecular mechanisms  
74 that mediate synaptic plasticity [12]. A literature review of tES-related studies confirmed positive effects,  
75 such as the enhancement of cognitive functions, including memory and learning, and improved  
76 subjective sleep quality [13-15].

77           While tES-related studies have shown its positive impact on subjective sleep measures, the  
78 findings related to objective sleep quality are not clear, indicating the need for scientific evidence through  
79 further research. In this context, this study was conducted to examine the effect of Healing Fit on  
80 objective and subjective sleep parameters, stress, balance of the ANS, and concentration in adults with  
81 impaired sleep quality and to provide foundational data for future research.

82

## 83 **MATERIALS AND METHODS**

### 84 **Study design**

85 This study adopted a randomized controlled group pretest–posttest design to apply the Healing Fit  
86 program and assess its effects on sleep quality, stress, and concentration.

87

### 88 **Participants**

89 The participants were adults residing in the Seoul, Uijeongbu, Daejeon, and Gimcheon regions of South  
90 Korea who had experienced sleep deprivation. The target population was healthy adults aged between  
91 20 and 60 years, recruited through a public announcement. Participants gave prior written consent at  
92 the time of recruitment, and it was explained to them that the study would be conducted from February  
93 27, 2023 to April 2, 2023.

94           The inclusion criteria were: 1) consented to participate in the study after understanding its

95 purpose and objectives; 2) being conscious and able to communicate; 3) 20–60 years of age; 4) both  
96 men and women; and 5) no diseases affecting hearing. The exclusion criteria were: 1) on medication  
97 for physical or mental illnesses (e.g., anti-anxiety drugs, sleeping pills, painkillers), and 2) affected by  
98 chronic disease. The study was conducted with volunteers who applied after the recruitment  
99 announcement. The study was approved by the Institutional Review Board of Eulji University in  
100 Uijeongbu (approval number: EU22-90).

101

## 102 **Sample size calculation**

103 The minimum sample size was determined using G\*power 3.1.9 by inputting a significance level of 0.05,  
104 power (1- $\beta$ ) of 0.80, and effect size of 0.25. The medium effect size of 0.25 was derived from Cohen's  
105 f. As a result, a total required sample size of 44 was calculated, and 50 participants were recruited,  
106 taking a dropout rate of 10% into account.

107

## 108 **Participant allocation and blinding**

109 Fifty participants were randomized into experimental and control groups (25 each) using block blind  
110 randomization based on random number generation in Microsoft Excel (Microsoft, Redmond, WA). All  
111 data from the 50 participants were collected and used for analysis without any dropouts during the data  
112 collection process (Fig 1).

113

### 114 **Fig 1. CONSORT flow diagram.**

115

116 Furthermore, to minimize the diffusion effect, data were collected from the control group first, followed  
117 by the experimental group's treatment and data collection upon completion of the treatment. One  
118 research assistant carried out both the pretest and posttest, and researchers were blinded to the  
119 allocation to enhance the validity of the study.

120

## 121 **Experimental treatment**

122 The laboratory occupies an area of 19.83 m<sup>2</sup>, and the indoor temperature was set at 25°C, taking into

123 consideration the optimal conditions for measuring stress levels, heart rate, blood pressure, autonomic  
124 balance, and concentration. The laboratory featured windows to ensure proper ventilation and  
125 comfortable furniture, such as sofas, tables, and chairs, to create a welcoming environment for the  
126 participants. Moreover, specialized equipment for monitoring stress, heart rate, autonomic balance, and  
127 measuring blood pressure was installed.

128           Healing Fit is a device that provides tES and sound therapy. tES sends a weak electrical signal  
129 to the surface of the brain through electrodes located on the scalp, inducing spontaneous nerve cell  
130 activity, normalizing brain function, and increasing the secretion of endorphins, thereby managing stress  
131 and controlling pain. Concurrently, sound therapy delivers a frequency of 200 Hz to the left ear and 210  
132 Hz to the right ear through stereo headphones. The brain perceives this sound as the difference between  
133 the two frequencies (i.e., 10 Hz), referred to as the third signal sound or binaural beat. This signal  
134 resonates with the brain's neural nucleus and sends the signal to the cerebral cortex, altering existing  
135 brain waves. Sound therapy consists of healing, sleep, and learning modes. The effects of sound  
136 therapy include reducing cortisol secretion, increasing natural killer cells, and restoring balance in the  
137 ANS.

138           The experimental group was treated with Healing Fit for 30 min at a volume of 50 dB, equivalent  
139 to the sound level of normal conversation. tES intensity was individually adjusted within a range of 1 to  
140 10, where the participant did not experience pain. Participants were introduced to the operation of  
141 Healing Fit and its application was demonstrated in the laboratory. Initially applied at level 5, subsequent  
142 adjustments were made according to the presence or absence of pain, and the applicable intensity  
143 levels were determined and taught to the participants. The experimental group was instructed to apply  
144 the music interventions for learning, healing, and sleep within the Healing Fit program three times a day  
145 (30 min per session) for 14 days while engaging in daily activities. They were informed that if pain was  
146 felt during application, they could reduce the intensity to 1, and if the application became difficult due to  
147 pain, they could stop the experiment at any time. The control group did not receive any treatment and  
148 continued their daily activities.

149

## 150 **Research tools**

151 Objective sleep quality was determined by measuring the following values using FitBit Charge 4 (FB407;

152 FitBit Inc., San Francisco, CA):

153 ① Total sleep time: the total time (min) that the participant slept.

154 ② Waking after sleep onset: the total time spent awake (min) between falling asleep and waking up.

155 ③ Deep sleep: Stage 3 non-rapid-eye-movement sleep (min) measured as deep sleep on FitBit  
156 Charge 4.

157 ④ Sleep efficiency: percentage (%) of total sleep time excluding the time awake after sleep onset

158 Sleep quality was assessed using the Korean Modified Leeds Sleep Evaluation Questionnaire  
159 (KMLSEQ) [16]. The KMLSEQ consists of 10 items, each measured on a 100-mm visual analog scale  
160 (VAS), evaluating the ease of falling asleep, the quality of sleep, the ease of awakening, and behavior  
161 following waking. The sleep score is determined by dividing the sum of all item scores by the number of  
162 items, resulting in a range from 0–100. Higher scores indicate better sleep quality, and a score of 66 is  
163 considered a cutoff point, with scores below this threshold deemed to represent poor sleep quality.

164 Objective stress was assessed through a stress index, calculated by quantifying the balance of the ANS  
165 (hereinafter referred to as "ANS balance") using a 12-lead echocardiogram. This calculation was based  
166 on heart rate variability (HRV) data, continuously measured for a duration of 5 min using the Canopy9  
167 RSA system (IEMBIO, Chuncheon, Korea). The stress index has a range of 1–10, with higher values  
168 reflecting a greater degree of exposure to stress.

169 Subjective stress was measured with the VAS, in which the participant indicates the perceived  
170 level of stress on a 10-cm horizontal line marked with numbers from 0–10, with higher scores meaning  
171 higher perceived stress.

172 ANS balance is the interaction between the parasympathetic and sympathetic components of  
173 the ANS. It can be assessed by continuously measuring HRV for 5 min and measuring the low-frequency  
174 (LF) and high-frequency (HF) bands of HRV, which are associated with the SNS and PNS, respectively.  
175 The higher the SNS activity (LF) and the lower the PNS activity (HF), the higher the stress level, with a  
176 higher ANS balance (LF/HF ratio) indicating more stress.

177 Concentration levels were assessed using Part B of the Trail Making Test, included in Reitan's  
178 neuropsychological test battery [17]. This test, primarily used to evaluate cognitive function with a focus  
179 on concentration, requires the test-taker to use a writing tool to draw lines connecting elements in the  
180 order of 1-A-2-B-3-C, with the time taken to complete the task being measured. If the test-taker  
181 accidentally lifts their hand off the paper, an immediate correction is made, and the final time taken to

182 complete the task without mistakes is recorded.

183

## 184 **Data Collection**

185 Data were collected from the control group from February 27, 2023 to April 2, 2023, and from the  
186 experimental group from April 3, 2023 to May 7, 2023, after administration of the Healing Fit program  
187 as explained above.

188 Before administration of the Healing Fit program to the experimental group, general  
189 characteristics, subjective sleep quality, subjective and objective stress, ANS balance (LF/HF ratio),  
190 heart rate, blood pressure, and concentration level were measured. After baseline measurements  
191 (pretest), the experimental group received Healing Fit training in the laboratory. During Healing Fit  
192 application, the intensity of tES was set at a level where the participant felt no pain. Prior to initial  
193 application, the best intensity for each participant was tested by varying the intensity among five levels.  
194 Additionally, they were trained to wear the Fitbit Charge 4 while sleeping. The experimental group  
195 followed the Healing Fit program's learning, healing, and sleep music interventions three times a day  
196 (30 min per session) for 14 days while continuing their routine daily lives. The baseline measurement of  
197 objective sleep quality refers to the results of sleep patterns transmitted to a smartphone from the Fitbit  
198 Charge 4 worn on the day they received training in the laboratory. From the day after the first sleep, the  
199 experimental group applied the Healing Fit device three times a day. On day 7, the experimental group  
200 sent the sleep quality results to the research assistant via smartphone, and on day 14, post-intervention  
201 measurements were taken for objective and subjective sleep quality, objective and subjective stress,  
202 ANS balance, and concentration.

203 The control group underwent the same measurements as the experimental group at baseline:  
204 general characteristics, subjective sleep quality, subjective and objective stress, ANS balance (LF/HF  
205 ratio), heart rate, and concentration. The control group was also trained to wear the Fitbit Charge 4 while  
206 sleeping. They then spent 14 days living their routine daily lives without intervention and sent the results  
207 of sleep quality to the research assistant via smartphone on day 7. On day 14, post-measurements were  
208 taken for objective and subjective sleep quality, objective and subjective stress, ANS balance, and  
209 concentration.

210



## 211 **Data Analysis**

212 The collected data was analyzed using SPSS for Windows version 26.0 (IBM, Armonk, NY). The  
213 homogeneity of the general characteristics of the participants was analyzed using frequency,  
214 percentage, mean, *t*-test, and the  $\chi^2$ -test. The homogeneity of the dependent variables was analyzed  
215 using the *t*-test. *T*-tests and repeated-measures analysis of variance were used to evaluate the  
216 treatment effects between the experimental and control groups. Additionally, the partial  $\eta^2$  was analyzed  
217 to explain the effect size between independent and dependent variables. The effect size was small,  
218 medium, or large if the partial  $\eta^2$  was 0.01, 0.06, or 0.14, respectively. Therefore, the closer the value of  
219 partial  $\eta^2$  was to 1, the greater the mean difference between the groups and the smaller the error. The  
220 *P*-value for hypothesis testing was set at 0.05.

221 After completing data collection with the experimental group, the control group received the  
222 same intervention. All members of the control group were administered the Healing Fit program for 14  
223 days in the same manner as the experimental group, except for those who opted out of participating in  
224 the experimental intervention.

225

## 226 **RESULTS**

### 227 **Baseline homogeneity between the experimental and** 228 **control groups**

229 The general characteristics of the 50 participants who took part in the study are outlined in Table 1.  
230 Participants were randomly assigned to either the Healing Fit non-application group (control group) or  
231 the Healing Fit application group (experimental group), with 25 in each group. The control group included  
232 11 males (44%) and 14 females (56%) and the experimental group included 8 males (32%) and 17  
233 females (68%). The mean ages and subjective sleep times of the control and experimental groups were  
234  $28.88 \pm 4.64$  and  $27.64 \pm 5.44$  years, respectively, and  $405.60 \pm 72.00$  and  $406.80 \pm 75.54$  min,  
235 respectively. No intergroup differences were observed in sex, age, subjective sleep time, marital status,  
236 education level, occupation type, number of family members, smoking status, or drinking habits.

237

238 Table 1. Participants' general characteristics and the results of homogeneity testing of dependent

239 variables (n = 50)

| Variables               | Categories                     | Cont. G               | Exp. G                | X <sup>2</sup> or t | p     |
|-------------------------|--------------------------------|-----------------------|-----------------------|---------------------|-------|
|                         |                                | (n = 25)              | (n = 25)              |                     |       |
|                         |                                | Mean ± SD or N<br>(%) | Mean ± SD or N<br>(%) |                     |       |
| Sex                     | Male                           | 11(44.0)              | 8(32.0)               | -0.863              | 0.392 |
|                         | Female                         | 14(56.0)              | 17(68.0)              |                     |       |
|                         | Age (years)                    | 28.88 ± 4.64          | 27.64 ± 5.44          | 0.226               | 0.822 |
|                         | Subjective sleep time (min)    | 405.60 ± 72.0         | 406.80 ± 75.54        | -0.057              | 0.954 |
| Marital status          | Married                        | 9(36.0)               | 8(32.0)               | -0.335              | 0.793 |
|                         | Unmarried                      | 16(64.0)              | 17(68.0)              |                     |       |
| Education               | High school                    | 9(36.0)               | 8(32.0)               | -0.257              | 0.798 |
|                         | Undergraduate                  | 15(60.0)              | 16(64.0)              |                     |       |
|                         | Postgraduate or higher         | 1(4.0)                | 1(4.0)                |                     |       |
| Occupation              | Office                         | 6(24.0)               | 6(24.0)               | -0.592              | 0.557 |
|                         | Professional                   | 13(52.0)              | 12(48.0)              |                     |       |
|                         | Self-employed                  | 6(24.0)               | 7(28.0)               |                     |       |
| Smoking                 | Yes                            | 15(60.0)              | 12(48.0)              | -0.840              | 0.405 |
|                         | No                             | 10(40.0)              | 13(52.0)              |                     |       |
| Drinking                | Yes                            | 22(88.0)              | 20(80.0)              | -0.760              | 0.451 |
|                         | No                             | 3(12.0)               | 5(20.0)               |                     |       |
|                         | Subjective sleep quality       | 47.64 ± 9.15          | 48.56 ± 8.96          | -0.359              | 0.721 |
|                         | Subjective stress (VAS)        | 5.48 ± 0.96           | 5.44 ± 0.96           | 0.147               | 0.884 |
| Objective sleep quality | Total sleep time (min)         | 404.84 ± 29.12        | 392.48 ± 26.46        | 1.571               | 0.123 |
|                         | Waking after sleep onset (min) | 76.40 ± 7.95          | 76.56 ± 6.46          | -0.078              | 0.938 |
|                         | Sleep efficiency (%)           | 81.07 ± 2.01          | 80.49 ± 1.08          | 1.289               | 0.203 |

|                  |                         |               |               |        |       |
|------------------|-------------------------|---------------|---------------|--------|-------|
|                  | Deep sleep (%)          | 16.00 ± 2.08  | 15.84 ± 1.84  | 0.288  | 0.755 |
| Objective stress | Stress index            | 6.44 ± 0.92   | 6.16 ± 0.85   | 1.120  | 0.268 |
|                  | High-frequency activity | 4.38 ± 0.72   | 4.20 ± 0.60   | 0.967  | 0.339 |
|                  | Low-frequency activity  | 5.90 ± 0.81   | 6.09 ± 0.78   | -0.803 | 0.426 |
| Vital signs      | Heart rate (bpm)        | 74.88 ± 7.58  | 75.04 ± 8.56  | -0.070 | 0.944 |
|                  | SBP (mmHg)              | 114.96 ± 8.86 | 112.80 ± 8.74 | 0.868  | 0.390 |
|                  | DBP (mmHg)              | 76.24 ± 7.25  | 72.48 ± 7.67  | 1.781  | 0.081 |
|                  | Concentration           | 83.92 ± 21.34 | 84.64 ± 13.02 | -0.144 | 0.886 |

240 Exp. G: experimental group; Cont. G: control group; SD: standard deviation; VAS: visual analog scale; SBP:

241 systolic blood pressure; DBP: diastolic blood pressure. \*p < 0.05

242

243 Table 1 also presents the results of homogeneity testing of the dependent variables: stress,  
 244 sleep quality, and concentration. The subjective sleep quality score was 47.64 in the control group and  
 245 48.56 in the experimental group. Subjective stress levels were 5.48 in the control group and 5.44 in the  
 246 experimental group. A comparison of the variables associated with objective sleep quality between  
 247 groups yielded the following results: total sleep time was 404.84 min for the control group vs. 392.48  
 248 min for the experimental group, waking after sleep onset was 76.40 vs. 76.56 min, sleep efficiency was  
 249 81.07% vs. 80.49%, and deep sleep duration was 16.00 vs. 15.84 min. No significant differences were  
 250 observed between groups in terms of subjective sleep quality or subjective stress.

251 A comparison of objective stress between the control and experimental groups yielded the  
 252 following results: the objective stress index was 6.44 vs. 6.16, with HF activity of 4.38 vs. 4.20 and LF  
 253 activity of 5.90 vs. 6.09; among the vital signs, heart rate was 74.88 vs. 75.04 bpm, systolic blood  
 254 pressure was 114.96 vs. 112.80 mmHg, and diastolic blood pressure was 76.24 vs. 72.48 mmHg; and  
 255 concentration level was 83.92% vs. 84.64%, respectively. No significant differences were observed  
 256 between groups in terms of objective stress, vital signs, or concentration.

257

## 258 **Effect of Healing Fit on sleep quality, stress, and**

## 259 **concentration**

260 Objective sleep quality was measured three times: at baseline, on day 7, and on day 14. The mean total  
 261 sleep time measured on day 7 was significantly different between the control and experimental groups,  
 262 with 392.92 vs. 407.16 min ( $p = 0.017$ ), as did the mean total sleep time measured on day 14 (391.88  
 263 vs. 411.68 min,  $p = 0.023$ ). Repeated measurements of total sleep time over 14 days showed no  
 264 significant difference ( $p = 0.175$ ) based on time or group but showed a significant interaction effect  
 265 between group and time ( $p < 0.001$ ). The effect size ( $\eta^2$ ) of the treatment based on group and time was  
 266 0.130 (Table 2).

267

268 Table 2. Comparison of objective sleep quality between the experimental and control groups

| Variables                     |                                             | Cont. G         | Exp. G         | t              | p              | F(P)           |               |
|-------------------------------|---------------------------------------------|-----------------|----------------|----------------|----------------|----------------|---------------|
|                               |                                             | (n = 25)        | (n = 25)       |                |                |                |               |
|                               |                                             | Mean ± SD       | Mean ± SD      |                |                |                |               |
| Objective<br>sleep<br>quality | Total sleep<br>time<br>(min)                | D <sub>0</sub>  | 404.84 ± 29.12 | 392.48 ± 26.46 | 1.571          | 0.123          | Time          |
|                               |                                             | D <sub>7</sub>  | 392.92 ± 25.62 | 407.16 ± 12.19 | -2.510         | 0.017*         | 0.237(0.790)  |
|                               |                                             |                 |                |                |                |                | Group         |
|                               |                                             |                 |                |                |                |                | 1.899(0.175)  |
|                               |                                             | D <sub>14</sub> | 391.88 ± 26.99 | 411.68 ± 32.38 | -2.349         | 0.023*         | TxG           |
|                               |                                             |                 |                |                |                |                | 7.148(<0.001) |
|                               | Time awake<br>after sleep<br>onset<br>(min) | D <sub>0</sub>  | 76.40 ± 7.95   | 76.56 ± 6.46   | -0.078         | 0.938          | Time          |
|                               |                                             | D <sub>7</sub>  | 77.72 ± 3.63   | 75.68 ± 3.86   | 1.924          | 0.060          | 1.063(0.350)  |
|                               |                                             |                 |                |                |                |                | Group         |
|                               |                                             |                 |                |                |                |                | 7.991(0.007)  |
|                               |                                             | D <sub>14</sub> | 78.32 ± 5.34   | 72.12 ± 5.16   | 4.174          | <0.001<br>*    | TxG           |
|                               |                                             |                 |                |                |                |                | 4.346(0.016)  |
| Sleep efficiency<br>(%)       | D <sub>0</sub>                              | 81.07 ± 2.01    | 80.49 ± 1.78   | 1.289          | 0.203          | Time           |               |
|                               | D <sub>7</sub>                              | 80.13 ± 1.81    | 81.40 ± 1.04   | -3.052         | 0.004*         | 1.217(0.301)   |               |
|                               |                                             |                 |                |                |                | Group          |               |
|                               | D <sub>14</sub>                             | 79.91 ± 2.05    | 82.42 ± 1.32   | -5.143         | <0.001<br>*    | 12.543(<0.001) |               |
|                               |                                             |                 |                |                | TxG            |                |               |
|                               |                                             |                 |                |                | 13.944(<0.001) |                |               |

|                | D <sub>0</sub>  | 16.00 ± 2.08 | 15.84 ± 1.84 | 0.288  | 0.755  | Time           |
|----------------|-----------------|--------------|--------------|--------|--------|----------------|
| Deep sleep (%) |                 |              |              |        | <0.001 | 0.536(0.587)   |
|                | D <sub>7</sub>  | 14.68 ± 1.75 | 16.48 ± 1.26 | -4.172 | *      | Group          |
|                |                 |              |              |        | <0.001 | 14.650(<0.001) |
|                | D <sub>14</sub> | 14.60 ± 2.18 | 17.00 ± 1.80 | -4.243 | *      | TxG            |
|                |                 |              |              |        |        | 8.080(0.001)   |

269 Exp. G: experimental group; Cont. G: control group; SD: standard deviation; TxG: time–group interaction. \*p <  
 270 0.05

271 Mean waking after sleep onset measured on day 7 was not significantly different between the  
 272 control and experimental groups (77.72 and 75.68 min, respectively, p = 0.060). However, a significant  
 273 intergroup difference was shown on day 14 (78.32 vs. 72.12 min, respectively, p < 0.001). Repeated  
 274 measurements over 14 days showed no significant effect of time (p = 0.350) but a significant effect of  
 275 group (p = 0.007) and a significant interaction effect between group and time (p = 0.016). The effect size  
 276 ( $\eta^2$ ) of the treatment based on group and time was 0.083 (Table 2, Fig 2).

277

278 **Fig 2. Comparison of waking after sleep onset (min) between the experimental and control**  
 279 **groups. D, day.**

280

281 Sleep efficiency was significantly different between the control and experimental groups at day  
 282 7 (80.13% vs. 81.40%, respectively, p = 0.004) and day 14 (79.91% vs. 82.42%, respectively, p < 0.001).  
 283 Repeated measurements over 14 days showed no significant effect of time (p = 0.301) but a significant  
 284 effect of group (p < 0.001) and a significant interaction effect between group and time (p < 0.001). The  
 285 effect size ( $\eta^2$ ) of the treatment based on group and time was 0.225 (Table 2, Fig 3).

286

287 **Fig 3. Comparison of sleep efficacy (%) between the experimental and control groups. D, day.**

288

289 Deep sleep (%) was significantly different between the control and experimental groups on day  
 290 7 (14.68% vs. 6.48%, respectively, p < 0.001) and day 14 (14.60% vs. 17.00%, respectively, p < 0.001).  
 291 Repeated measurements of deep sleep over 14 days showed no significant effect of time (p = 0.587)  
 292 but a significant effect of group (p < 0.001), as well as an interaction effect between group and time (p

293 < 0.001). The effect size ( $\eta^2$ ) of the treatment based on group and time was 0.144 (Table 2, Fig 4).

294

295 **Fig 4. Comparison of deep sleep (%) between the experimental and control groups.**

296 D, day.

297

298 Subjective sleep quality measurements are presented in Table 3. At baseline, the mean  
 299 subjective sleep quality scores were 47.64 for the control group and 48.56 for the experimental group.  
 300 On day 14, the mean scores differed significantly, with the control group scoring 49.88 and the  
 301 experimental group scoring 56.52 ( $p = 0.009$ ).

302

303 Table 3. Comparison of subjective sleep quality between the experimental and control groups

| Variables                |                 | Cont. G      | Exp. G       | t      | p      |
|--------------------------|-----------------|--------------|--------------|--------|--------|
|                          |                 | (n = 25)     | (n = 25)     |        |        |
|                          |                 | Mean ± SD    | Mean ± SD    |        |        |
| Subjective sleep quality | D <sub>0</sub>  | 47.64 ± 9.15 | 48.56 ± 8.96 | -0.359 | 0.721  |
|                          | D <sub>14</sub> | 49.88 ± 8.55 | 56.52 ± 8.75 | -2.715 | 0.009* |

304 Exp. G: experimental group; Cont. G: control group; SD: standard deviation. \* $p < 0.05$

305

306 Table 4 presents the objective stress measurement results. At baseline, the mean stress index  
 307 was 6.44 for the control group and 6.16 for the experimental group. On day 14, the mean scores were  
 308 6.16 for the control group and 3.52 for the experimental group, showing a significant difference between  
 309 the two groups ( $p < 0.001$ ) (Table 4).

310

311 Table 4. Comparison of subjective and objective stress between the experimental and control groups

| Variables        |              | Cont. G         | Exp. G      | t           | p      |         |
|------------------|--------------|-----------------|-------------|-------------|--------|---------|
|                  |              | (n = 25)        | (n=25)      |             |        |         |
|                  |              | Mean ± SD       | Mean±SD     |             |        |         |
| Objective stress | Stress index | D <sub>0</sub>  | 6.44 ± 0.92 | 6.16 ± 0.85 | 1.120  | 0.268   |
|                  |              | D <sub>14</sub> | 6.16 ± 0.80 | 3.52 ± 0.91 | 10.838 | <0.001* |

|                         |                 |               |               |        |         |
|-------------------------|-----------------|---------------|---------------|--------|---------|
| High-frequency activity | D <sub>0</sub>  | 4.38 ± 0.72   | 4.20 ± 0.60   | 0.967  | 0.339   |
|                         | D <sub>14</sub> | 4.17 ± 0.66   | 4.49 ± 0.64   | -1.743 | 0.088   |
| Low-frequency activity  | D <sub>0</sub>  | 5.90 ± 0.81   | 6.09 ± 0.78   | 0.656  | 0.517   |
|                         | D <sub>14</sub> | 7.30 ± 0.98   | 6.28 ± 0.83   | 3.150  | 0.004*  |
| Subjective stress (VAS) | D <sub>0</sub>  | 5.48 ± 0.96   | 5.44 ± 0.96   | 0.147  | 0.884   |
|                         | D <sub>14</sub> | 5.32 ± 0.99   | 3.16 ± 0.75   | 8.722  | <0.001* |
| Concentration           | D <sub>0</sub>  | 83.92 ± 21.34 | 84.64 ± 13.02 | -0.114 | 0.886   |
|                         | D <sub>14</sub> | 85.56 ± 18.99 | 78.24 ± 11.82 | 1.636  | 0.108   |

312 Exp. G: experimental group; Cont. G: control group; SD: standard deviation. \*p < 0.05

313

314 The mean HF activity results at baseline were 4.38 for the control group and 4.20 for the  
315 experimental group. On day 14, the mean scores were 4.17 for the control group and 4.49 for the  
316 experimental group, showing no significant difference between groups (Table 4).

317 The mean LF activity results at baseline were 5.90 for the control group and 6.09 for the  
318 experimental group. On day 14, the mean scores were 7.30 for the control group and 6.28 for the  
319 experimental group, showing a significant difference between groups (p = 0.004) (Table 4).

320

321 Subjective stress measurements are presented in Table 4. At baseline, the mean subjective  
322 stress score was 5.48 for the control group and 5.44 for the experimental group. On day 14, the mean  
323 scores differed significantly, with the control group scoring 5.32 and the experimental group scoring 3.16  
324 (p < 0.001).

325

326 Concentration measurements are presented in Table 4. At baseline, the mean concentration  
327 durations were 83.92 s for the control group and 84.64 s for the experimental group. On day 14, no  
328 significant difference was observed between groups (85.56 vs. 78.24 s, p < 0.001) (Table 4).

329

## 330 DISCUSSION

331 This study aimed to evaluate an intervention to enhance sleep quality and concentration and alleviate

332 stress in adults with compromised sleep health. To achieve this, we introduced the Healing Fit program  
333 utilizing tES. Over a span of 2 weeks, the experimental group subjected to Healing Fit exhibited a  
334 significant enhancement in both objective and subjective sleep quality when compared to the control  
335 group.

336 Objective sleep quality was analyzed based on metrics from the FitBit Charge 4 and  
337 encompassed total sleep time, waking after sleep onset, deep sleep, and sleep efficiency. Total sleep  
338 time, sleep efficiency, and the duration of deep sleep increased with Healing Fit, while the frequency of  
339 waking after sleep onset decreased, indicating an overall improvement in sleep quality. A prior study  
340 [18] also found that tES had a positive effect on objective sleep quality. Although different tools were  
341 used to measure objective sleep quality, both studies found an increase in objective sleep quality. In  
342 comparison with the previous study, our study involved a longer intervention (14 days vs. 3 sessions)  
343 and a larger sample size (50 vs. 13). Furthermore, the accuracy of the results of this study was  
344 established through a convenient intervention application.

345 Similarly, over the course of 2 weeks, there was a significant increase in the subjective sleep  
346 quality score of the experimental group compared to the control group. As reported in a prior study [4],  
347 tES positively impacted perceived improvement in subjective sleep quality. Our findings are consistent  
348 with another study [19] that suggested that psychological comfort associated with the treatment  
349 contributed to enhanced sleep quality and stress alleviation.

350 The overall results of the Healing Fit intervention indicate significant improvements in both  
351 objective and subjective sleep quality. The duration and proportion of deep sleep increased over time in  
352 the experimental group. This enhancement in objective sleep quality is likely to have influenced the  
353 perceived improvement in subjective sleep quality.

354 Following the 2-week Healing Fit intervention, the experimental group demonstrated a  
355 significant reduction in both objective and subjective stress compared to the control group. Stress can  
356 arise from external triggers but can also be due to accumulated physical fatigue and decreased  
357 resilience. It is imperative to manage stress in everyday life, given its association with cardiovascular  
358 diseases such as stroke, as well as various other chronic conditions [20]. Among the methods available  
359 for alleviating stress and aiding physical recovery, sleep stands out as particularly pivotal. Enhanced  
360 sleep quality exerts a positive influence on physical recuperation and is a key factor in stress reduction  
361 [21].



362 Objective stress was assessed using an ANS measuring device (Canopy 9) and subjective  
363 stress was assessed using a VAS. Following a 2-week intervention with Healing Fit, the experimental  
364 group exhibited a notable decrease in both objective and subjective stress compared to the control  
365 group. As indicated by an earlier study [22], tES was found to be effective in activating endorphins and  
366 reducing objective stress, which was in line with our findings. The decrease in both objective and  
367 subjective stress presumably contributed to improved sleep quality. Based on these favorable outcomes  
368 for subjective and objective sleep quality, it can be deduced that the application of Healing Fit resulted  
369 in increased deep sleep time and augmented sleep efficiency. This likely contributed to enhanced  
370 physical recovery and relaxation, further facilitating stress alleviation.

371 Over the 2-week Healing Fit intervention, the ANS balance measurements in the experimental  
372 group did not show significant differences when compared to the control group. Nevertheless, a prior  
373 study [23] found that tES reduced SNS activity while augmenting PNS activity. Although our study  
374 echoed these findings in terms of a positive shift in the balance between the SNS and PNS, it did not  
375 reach statistical significance. The LF/HF ratio serves as a significant marker for autonomic balance. An  
376 ideal LF/HF ratio is commonly understood to be 1.5 [24]. This ratio is considered more telling than  
377 standalone numerical statistics. In our study, the LF/HF ratio in the experimental group was close to 1.5.  
378 This implies that the Healing Fit application, through the provision of tES, mitigated stress stemming  
379 from physical fatigue and stabilized physiological indicators through enhanced sleep quality.

380 The concentration level measured over the 2-week Healing Fit intervention showed no  
381 significant difference between the experimental and control groups. In a prior study [25], however, tES  
382 had a positive effect on cognitive abilities related to memory and learning. This discrepancy might have  
383 arisen from differences in the participants' characteristics and measurement durations between the two  
384 studies. However, a pretest–posttest comparison did reveal an increase in the concentration level of the  
385 experimental group compared to the control group. It is hypothesized that Healing Fit influenced physical  
386 stability, stress levels, relaxation, and cognitive ability. In future research, extending the duration of  
387 Healing Fit application may yield more accurate and meaningful findings related to concentration.

388 Overall, Healing Fit showed significant enhancements in both objective and subjective sleep  
389 qualities. This signifies that the use of Healing Fit not only boosts objective sleep quality and sleep  
390 efficiency but also positively impacts perceived sleep quality. Superior sleep quality facilitates the  
391 maintenance of homeostasis, harmonizes the balance between the SNS and PNS, and ensures stability

392 in vital signs, such as blood pressure and heart rate. Moreover, enhanced sleep quality can reduce  
393 stress, bolster psychological stability, and augment cognitive abilities such as memory and learning.

394 This study is significant as it introduces the Healing Fit intervention as a possible treatment for  
395 adults struggling with sleep duration and quality. Healing Fit presents a more user-friendly approach  
396 with fewer side effects than conventional pharmacological treatments. Furthermore, Healing Fit's  
397 positive impact extends beyond sleep to aspects, such as stress and ANS balance. Its compact design  
398 offers the advantage of easy portability, enabling usage at any time or place. Based on these results, it  
399 is expected that applying the Healing Fit program to individuals experiencing sleep difficulties could  
400 enhance their quality of life.

401

## 402 **Conclusions and Limitations**

403 This study verified the efficacy of the Healing Fit application by demonstrating significant outcomes in  
404 objective and subjective sleep quality as well as stress. Healing Fit not only improved objective and  
405 subjective sleep quality and sleep efficiency but also aided in maintaining homeostasis. It ensured an  
406 appropriate balance between the SNS and PNS and positively influenced cognitive abilities. The efficacy  
407 of Healing Fit was established in this study by providing adults experiencing sleep difficulties and  
408 impaired sleep quality with an intervention that has fewer side effects that is easier to apply than  
409 pharmacological treatments. The results of this study highlight the feasibility of Healing Fit as an  
410 intervention beneficial for sleep and stress management. It is anticipated that applying it to a broader  
411 group of adults struggling with sleep issues could significantly enhance their quality of life.

412 This study recruited adults experiencing impaired sleep quality from the Seoul, Uijeongbu,  
413 Daejeon, and Gimcheon regions of South Korea. Given the regional variations in living environments  
414 and occupational backgrounds, it is crucial to approach the generalization of the results of this study  
415 with caution. Future studies should aim to include a more diverse participant pool.

416 Among the variables of this study, concentration did not yield statistically significant results.  
417 However, a comparison between the pretest and posttest outcomes of the experimental and control  
418 groups indicated a decline in concentration in the experimental group over time relative to the control  
419 group. This underscores the importance of longer-term interventions to determine the impact on  
420 concentration more accurately.

421

422

423

424

425

426

427

## REFERENCES

428

- 429 1. Korea Health Industry Development Institute. [Sleep industry fact-finding report 2019.] 2019 [cited  
430 date 2023 September 27]. Available from:  
431 <https://www.khidi.or.kr/board/view?linkId=48854252&menuId=MENU00314> [in Korean].
- 432 2. Birchler-Pedross A, Schröder CM, Münch M, Knoblauch V, Blatter K, Schnitzler-Sack C, et al.  
433 Subjective well-being is modulated by circadian phase, sleep pressure, age, and gender. *J Biol*  
434 *Rhythms*. 2009;24:232-242.
- 435 3. Park YJ, Lee WC, Yim HW, Park Y-M. [The association between sleep and obesity in Korean  
436 adults.] *J Prev Med Public Health*. 2007;40:454-460 [in Korean].
- 437 4. Dondé C, Brunelin J, Micoulaud-Franchi JA, Maruani J, Lejoyeux M, Polosan M, et al. The effects  
438 of transcranial electrical stimulation of the brain on sleep: a systematic review. *Front Psychiatry*.  
439 2021;12:646569.
- 440 5. Jung S-H, Park J. [Effect of life stress on the sleeping disorder of university student.] *J Korea Inst*  
441 *Electronic Commun Sci*. 2013;8 [in Korean].
- 442 6. Miglis M. Sleep and the autonomic nervous system. In: Miglis MG, editor. *Sleep and neurologic*  
443 *disease*. Cambridge: Elsevier; 2017. pp. 227-244.
- 444 7. Zoccoli G, Amici R. Sleep and autonomic nervous system. *Curr Opin Physiol*. 2020;15: 128-133.
- 445 8. Go K-B. *Stress & psychosomatic medicine*. Seoul: Ilchokak; 2011.
- 446 9. Brown RP, Gerbarg P. *The healing power of the breath: simple techniques to reduce stress and*  
447 *anxiety, enhance concentration, and balance your emotions*. Boston: Shambhala; 2012.
- 448 10. Nitsche MA, Cohen LG, Wassermann EM, Priori A, Lang N, Antal A, et al. Transcranial direct  
449 current stimulation: state of the art 2008. *Brain Stimul*. 2008;1:206-223.
- 450 11. Nitsche MA, Paulus W. Excitability changes induced in the human motor cortex by weak  
451 transcranial direct current stimulation. *J Physiol*. 2000;527:633-639.
- 452 12. Rroji O, van Kuyck K, Nuttin B, Wenderoth N. Anodal tDCS over the primary motor cortex facilitates  
453 long-term memory formation reflecting use-dependent plasticity. *PLoS One*. 2015;10:e0127270.
- 454 13. Coffman BA, Clark VP, Parasuraman R. Battery powered thought: enhancement of attention,  
455 learning, and memory in healthy adults using transcranial direct current stimulation. *Neuroimage*.  
456 2014;85 Pt 3:895-908.

- 457 14. Dayan E, Censor N, Buch ER, Sandrini M, Cohen LG. Noninvasive brain stimulation: from  
458 physiology to network dynamics and back. *Nat Neurosci*. 2013;16:838-844.
- 459 15. Levasseur-Moreau J, Brunelin J, Fecteau S. Non-invasive brain stimulation can induce paradoxical  
460 facilitation. Are these neuroenhancements transferable and meaningful to security services? *Front*  
461 *Hum Neurosci*. 2013;7:449.
- 462 16. Kim I, Choi H, Kim BJ. Psychometric properties of Korean version of modified Leeds sleep  
463 evaluation questionnaire (KMLSEQ). *Korean J Rehabil Nurs*. 2014;17:10-17.
- 464 17. Reitan RM. Validity of the Trail Making Test as an indicator of organic brain damage. *Percept Mot*  
465 *Skills*. 1958;8:271-276.
- 466 18. Hathaway E, Morgan K, Carson M, Shusterman R, Fernandez-Corazza M, Luu P, et al.  
467 Transcranial electrical stimulation targeting limbic cortex increases the duration of human deep  
468 sleep. *Sleep Med*. 2021;81:350-357.
- 469 19. Abend R, Jalon I, Gurevitch G, Sar-El R, Shechner T, Pine D, et al. Modulation of fear extinction  
470 processes using transcranial electrical stimulation. *Transl Psychiatry*. 2016;6:e913.
- 471 20. Cho J-J. [Stress and cardiovascular disease.] *J Korean Med Assoc*. 2013;1975:2093-5951 [in  
472 Korean].
- 473 21. Kim L. [Stress, sleep physiology, and related insomnia disorders.] *J Korean Med Assoc*. 2010;53:  
474 707-716 [in Korean].
- 475 22. Lebedev VP, Malygin AV, Kovalevski AV, Rychkova SV, Sisoiev VN, Kropotov SP, et al. Devices  
476 for noninvasive transcranial electrostimulation of the brain endorphinergic system: application for  
477 improvement of human psycho-physiological status. *Artif Organs*. 2002;26:248-251.
- 478 23. Montenegro RA, Farinatti PdeTV, Fontes EB, Soares PP, Cunha FA, Gurgel JL, et al. Transcranial  
479 direct current stimulation influences the cardiac autonomic nervous control. *Neurosci Lett*.  
480 2011;497:32-36.
- 481 24. Pomeranz B, Macaulay RJ, Caudill MA, Kutz I, Adam D, Gordon D, et al. Assessment of autonomic  
482 function in humans by heart rate spectral analysis. *Am J Physiol*. 1985;248:H151-153.
- 483 25. Barham MP, Enticott PG, Conduit R, Lum JA. Transcranial electrical stimulation during sleep  
484 enhances declarative (but not procedural) memory consolidation: evidence from a meta-analysis.  
485 *Neurosci Biobehav Rev*. 2016;63:65-77.

## Enrollment

Assessed for  
eligibility (n = 50)

Excluded (n = 0)

Randomised (n = 50)

## Allocation

Allocated to intervention (n = 25)

Received allocated intervention  
(n = 25)

Allocated to control (n = 25)

Received allocated control  
(n = 25)

## Follow up

Lost to follow up (n = 0)  
(give reasons)

Lost to follow up (n = 0)  
(give reasons)

## Analysis

Analysed (n = 25)

Analysed (n = 25)

## Figure

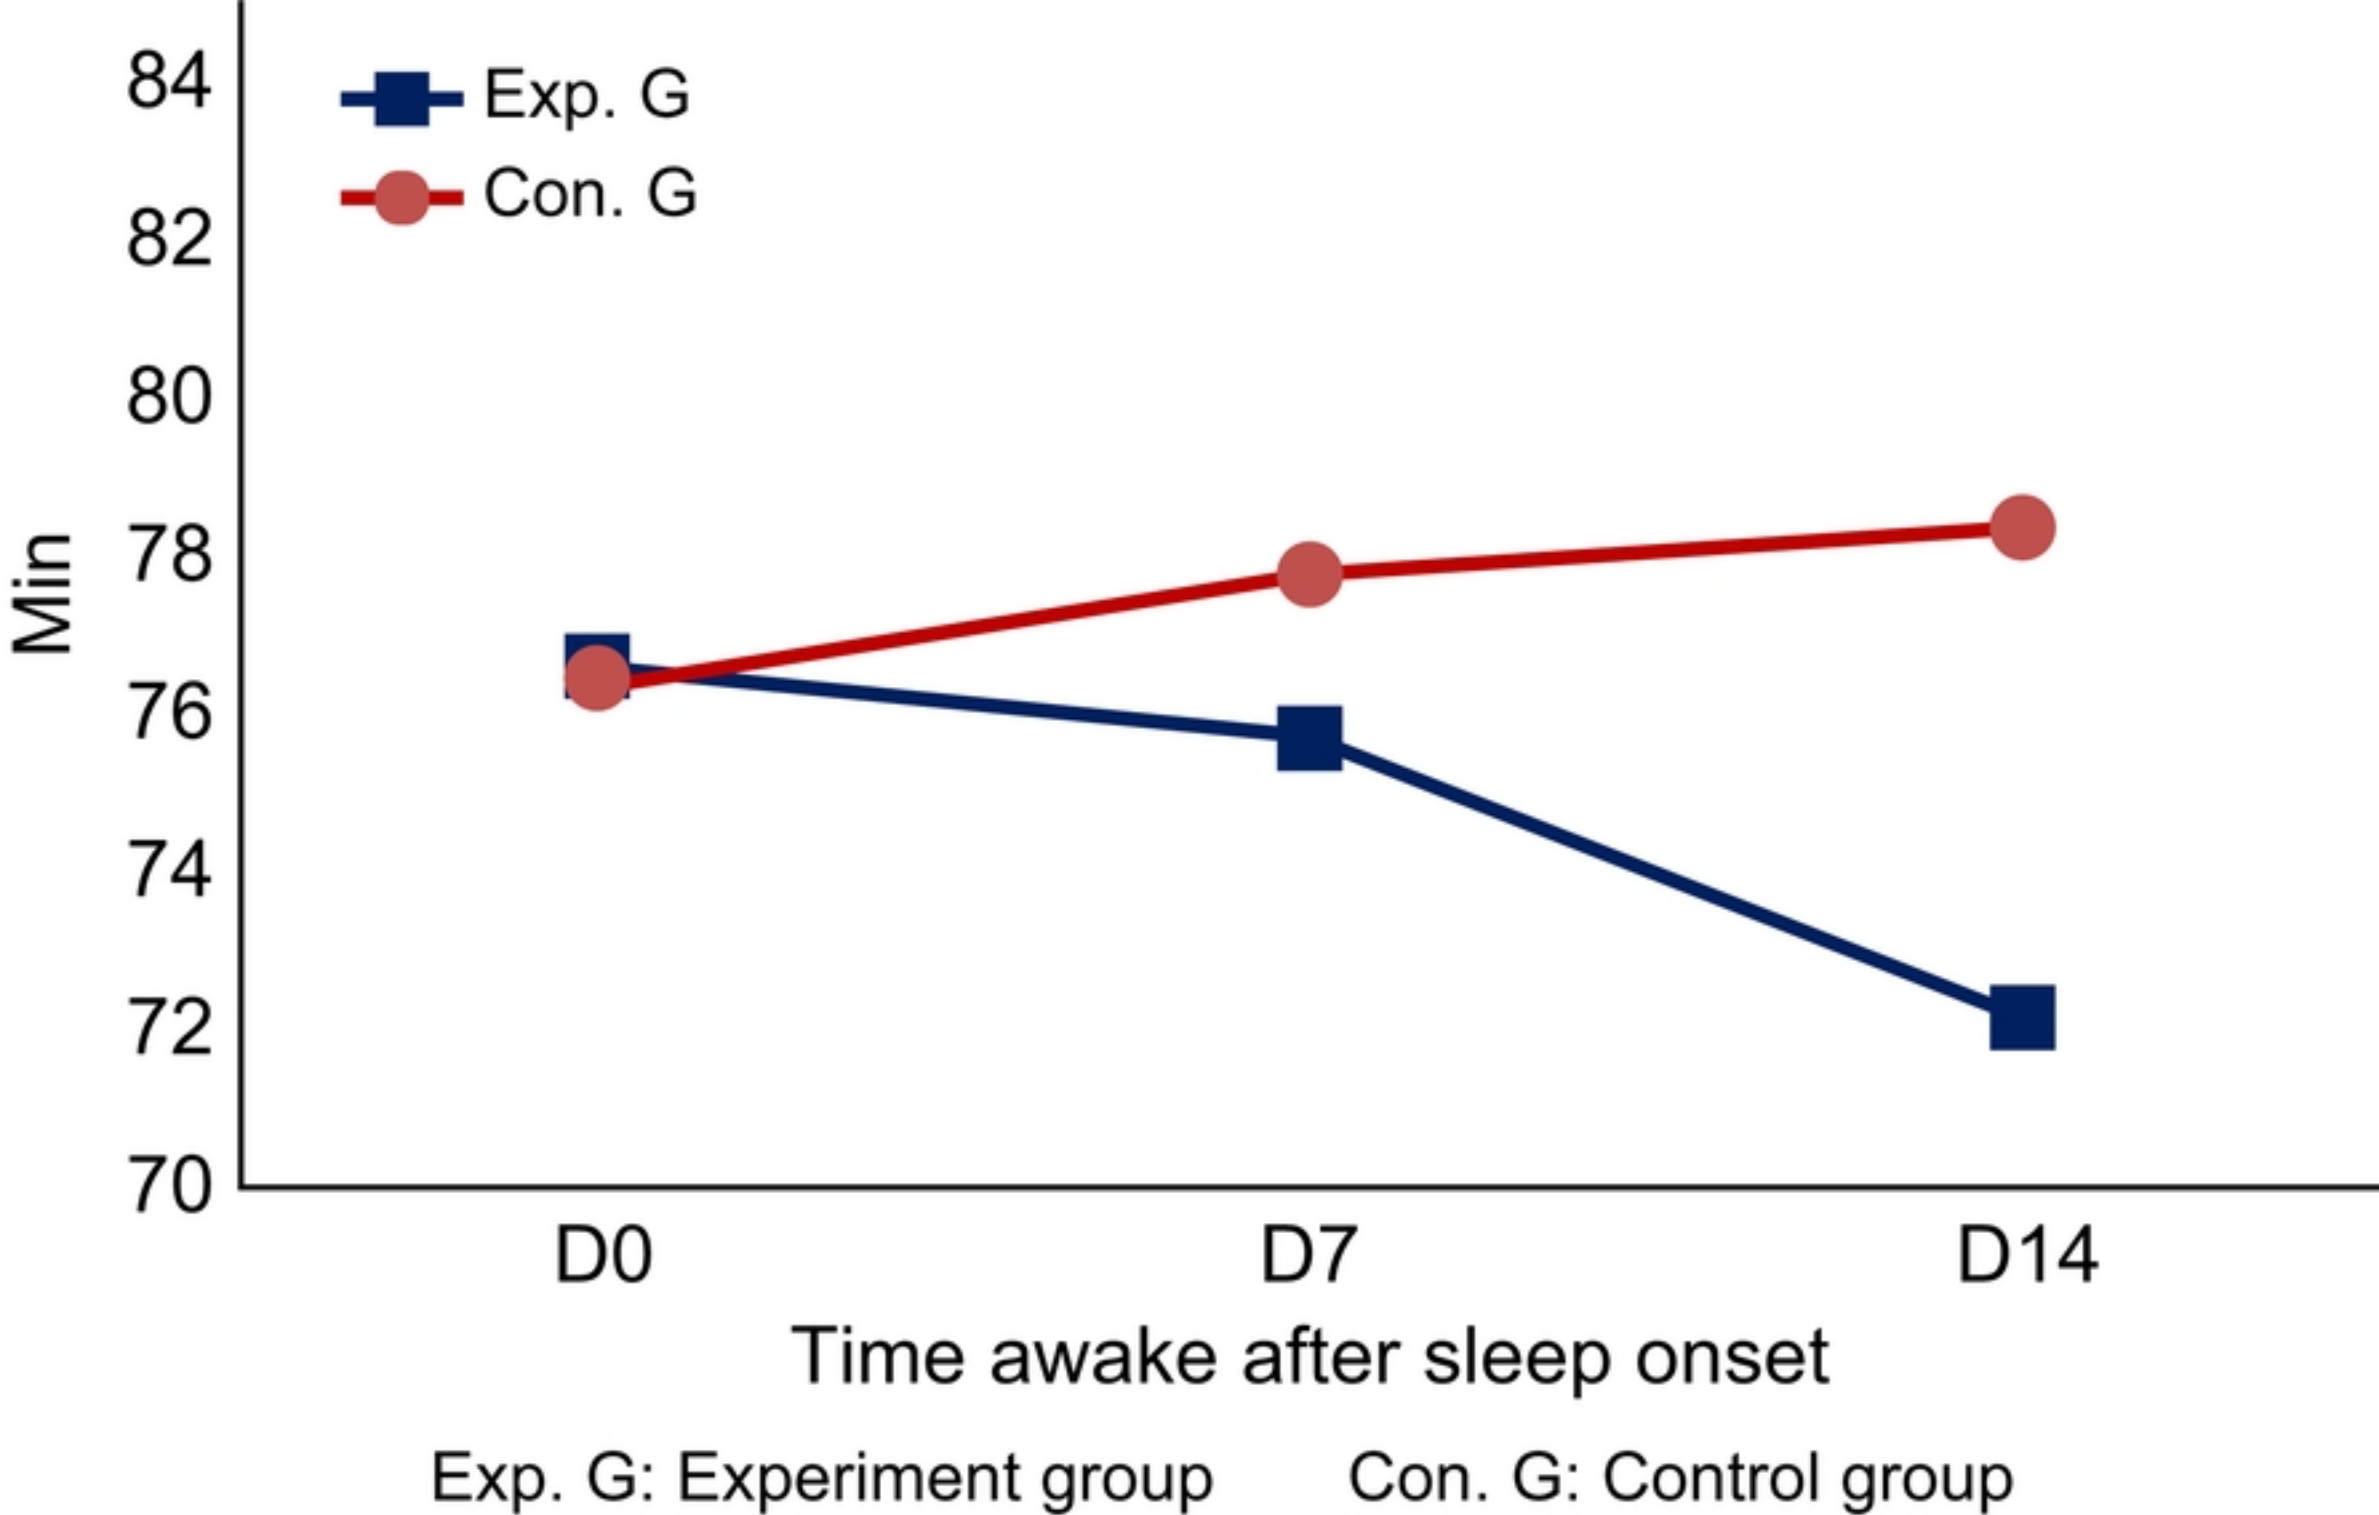

Figure

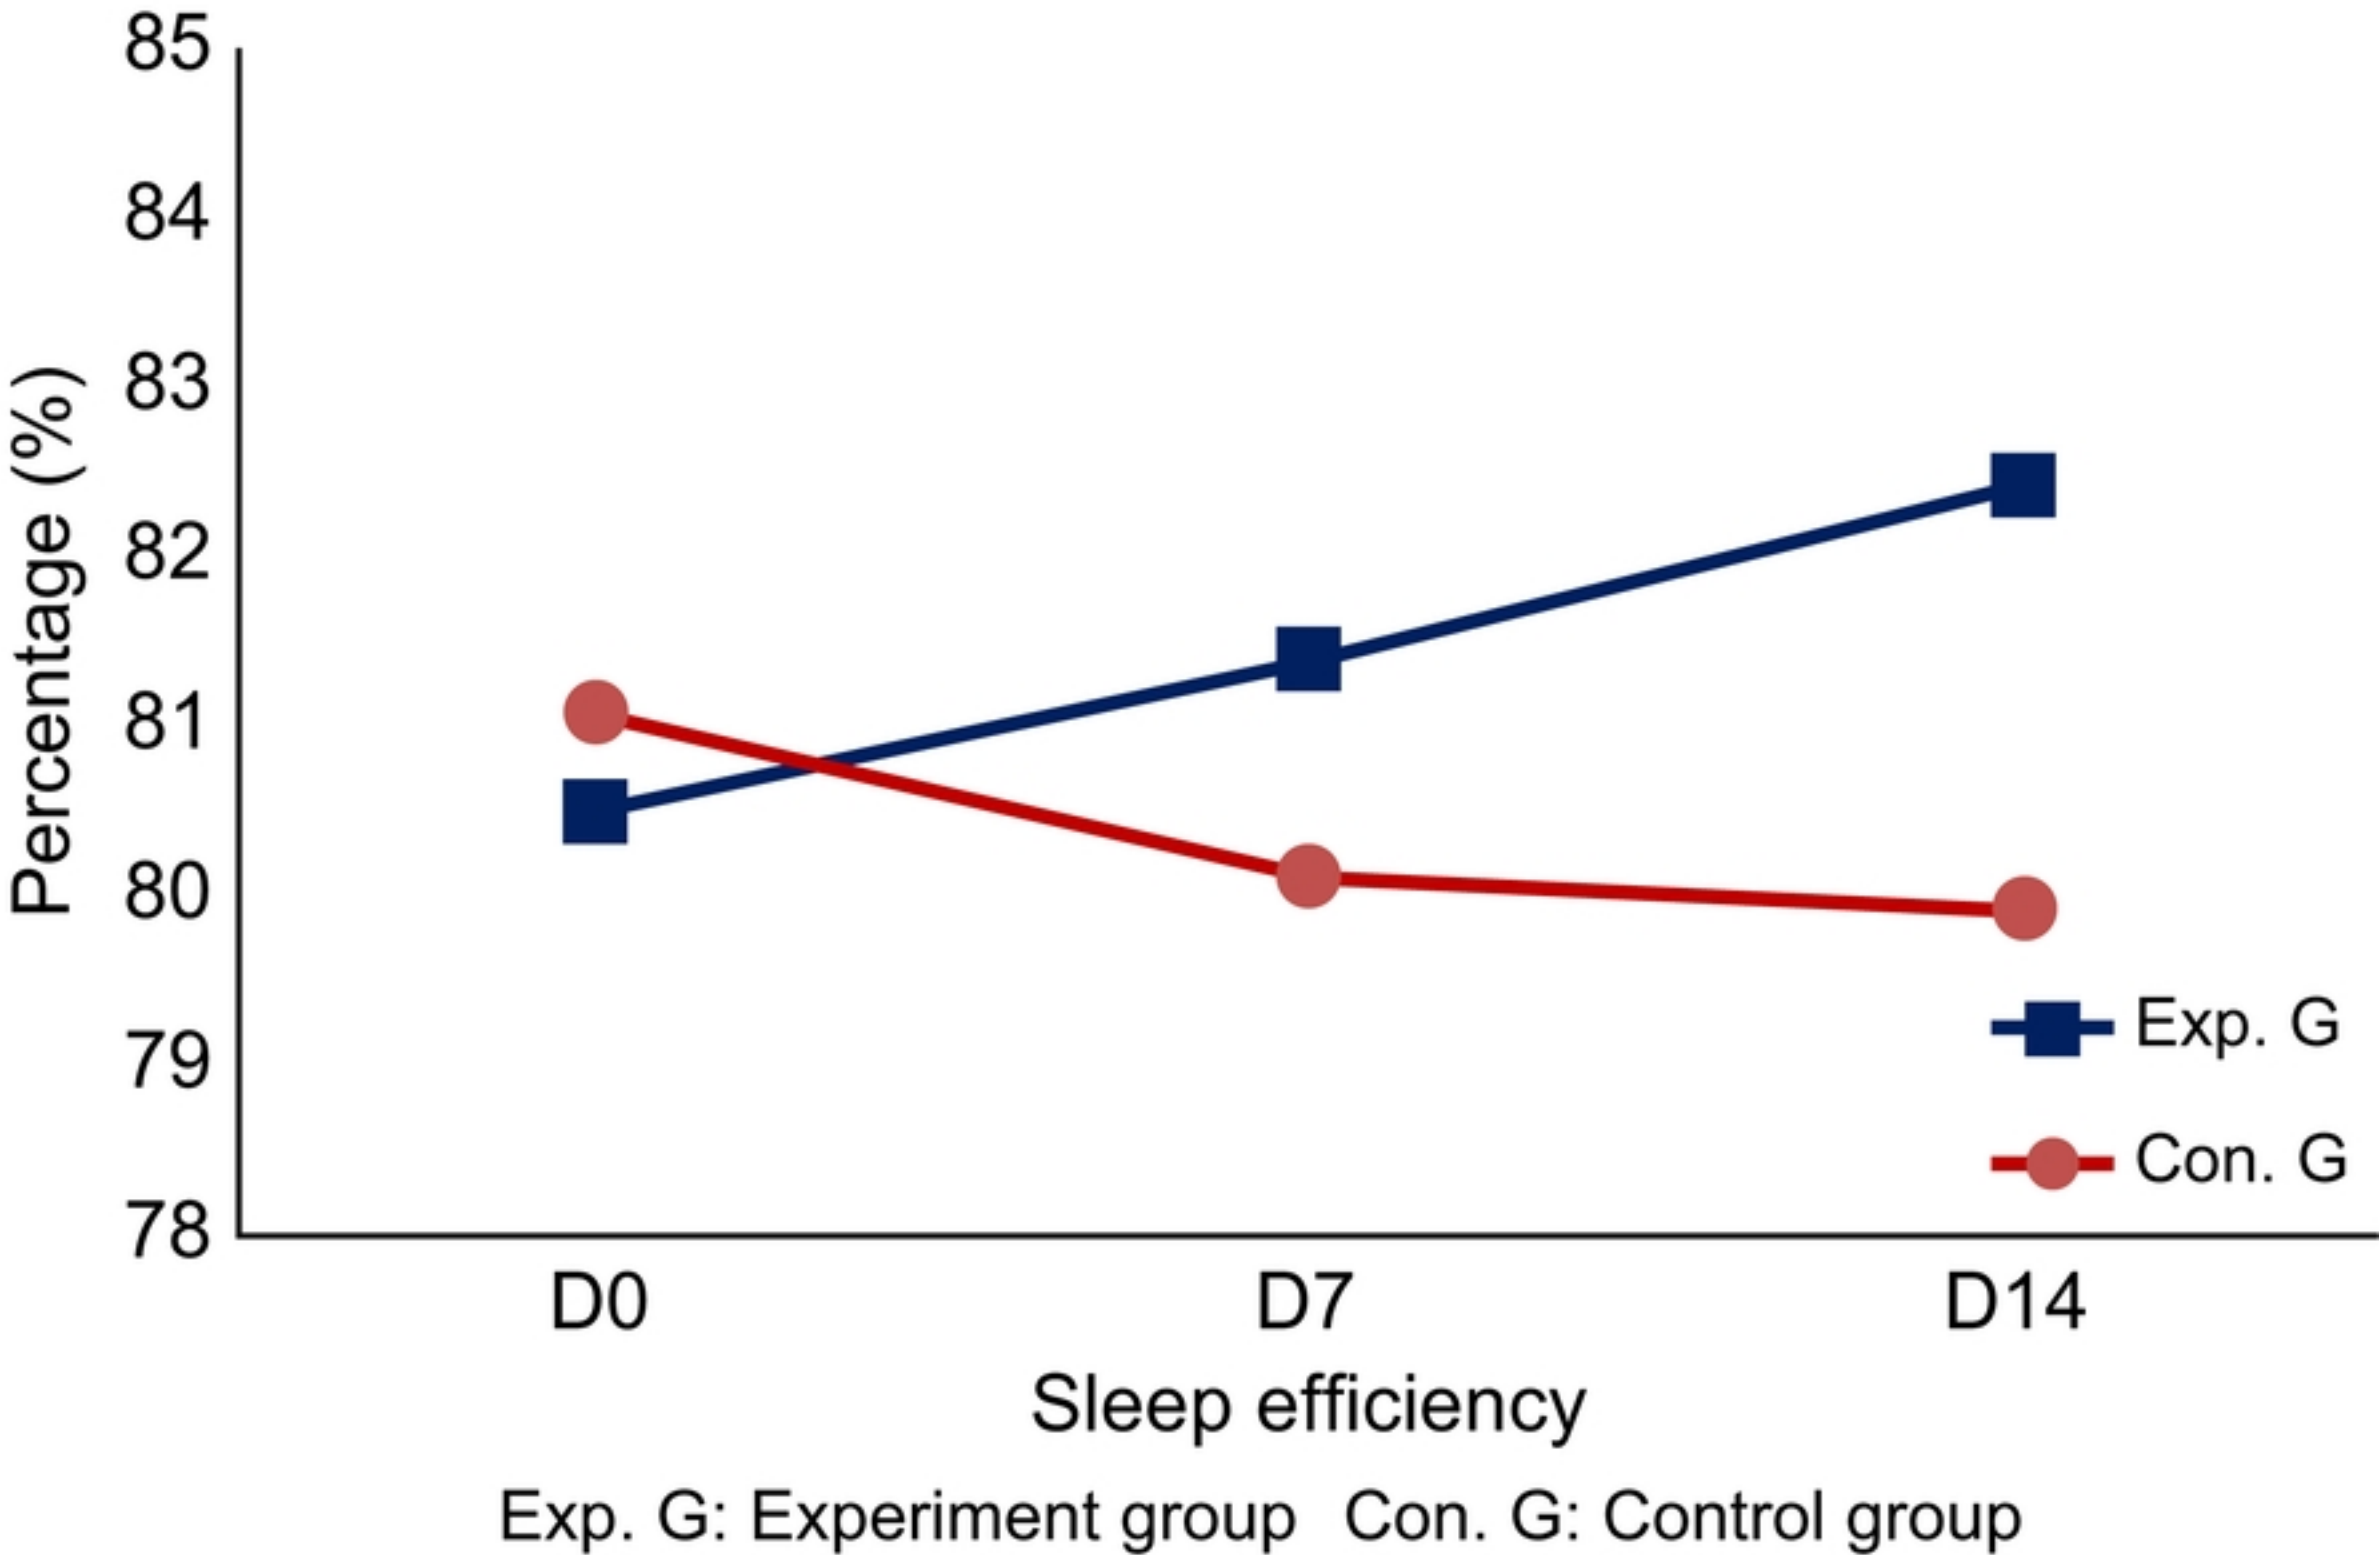

Figure



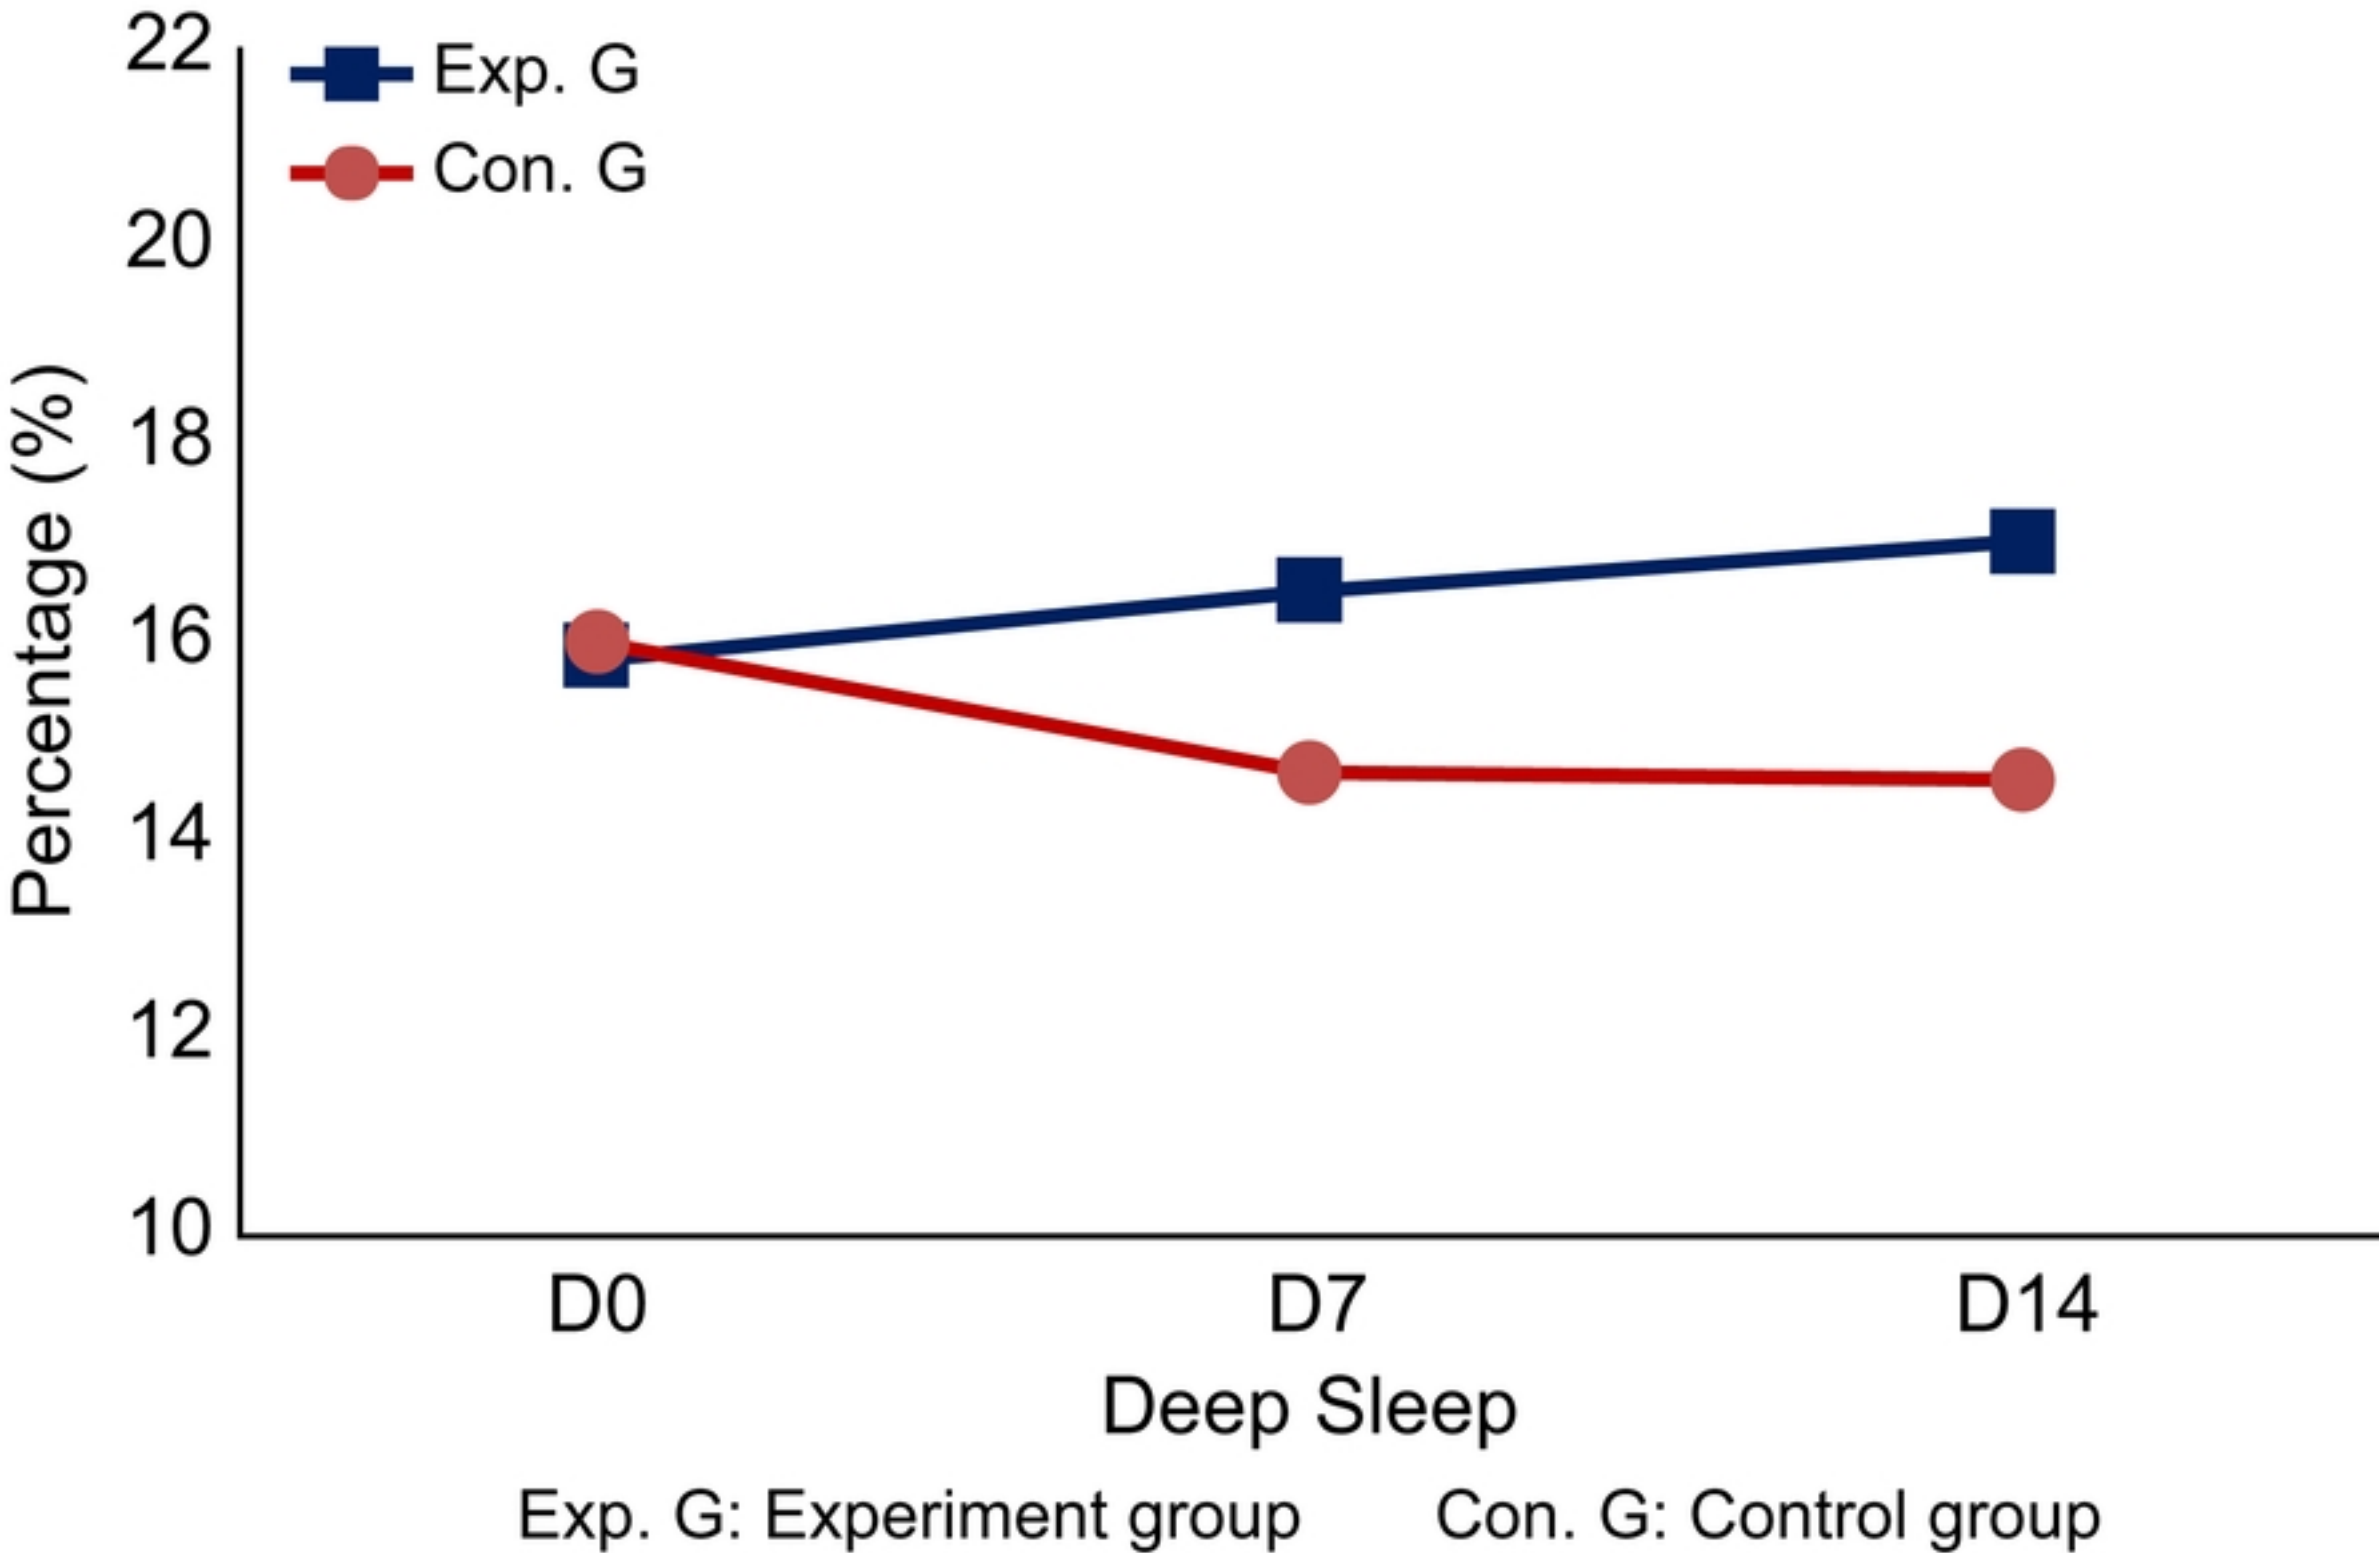

Figure
